# Supplementary material
Source: ML conference proceedings conference paper supplement (https://proceedings.mlr.press/v139/laber21a.html)
Supplement: Supplementary file [file laber21a-supp.pdf]

# On the price of explainability for some clustering problems

Eduardo Sany Laber  
PUC-Rio, Brazil  
laber@inf.puc-rio.br

Lucas Murtinho  
PUC-Rio, Brazil  
lucas.murtinho@gmail.com

## Abstract

The price of explainability for a clustering task can be defined as the unavoidable loss, in terms of the objective function, if we force the final partition to be explainable.

Here, we study this price for the following clustering problems:  $k$ -means,  $k$ -medians,  $k$ -centers and maximum-spacing. We provide upper and lower bounds for a natural model where explainability is achieved via decision trees. For the  $k$ -means and  $k$ -medians problems our upper bounds improve those obtained by [Dasgupta et. al, ICML 20] for low dimensions.

Another contribution is a simple and efficient algorithm for building explainable clusterings for the  $k$ -means problem. We provide empirical evidence that its performance is better than the current state of the art for decision-tree based explainable clustering.

## 1 Introduction

Machine learning models and algorithms have been used in a number of systems that take decisions that affect our lives. Thus, explainable methods are desirable so that people are able to have a better understanding of their behavior, which allows for comfortable use of these systems or, eventually, the questioning of their applicability.

Although most of the work on the field of explainable machine learning has been focusing on supervised learning [29, 23, 31], there has recently been some effort to devise explainable methods for unsupervised learning tasks, in particular, for clustering [25, 5]. We investigate the framework discussed by [25], where an explainable clustering is given by a partition, induced by the leaves of a decision tree, that optimizes some predefined objective function.

Figure 1 shows a clustering with three groups induced by a decision tree with 3 leaves. As an example, the blue cluster can be explained as the set of points that satisfy  $\text{Feature 1} \leq 70$  and  $\text{Feature 2} > 40$ . Simple explanations as this one are usually not available for the partitions produced by popular methods such as the Lloyd’s algorithm for the  $k$ -means problem.

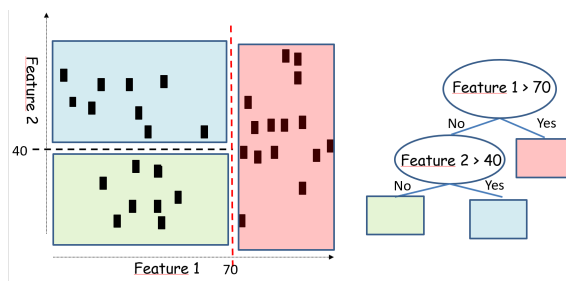

In order to achieve explainability, one may be forced to accept some loss in terms of the quality of the chosen objective function (e.g. sum of squared distances). In this sense, explainability has its price. [25] presents theoretical bounds on this price for the  $k$ -medians and the  $k$ -means objective functions.

Here, we expand on their work by presenting new bounds for these objectives and also providing nearly tight bounds for two other goals that arise in relevant clustering problems, namely, the  $k$ -centers and the maximum-spacing problems. We note that the objective for the latter is the one optimized by the widely known **Single-Linkage** method, employed for hierarchical clustering. We also give a more practice-oriented contribution by devising and evaluating a simple and efficient algorithm for building explainable clusterings for the  $k$ -means problem.

## 1.1 Problem definition

Let  $\mathcal{X}$  be a set of  $n$  points in  $\mathbb{R}^d$ . We say that a decision tree is *standard* if each internal node  $v$  is associated with a test (cut), specified by a coordinate  $i_v \in [d]$  and a real value  $\theta_v$ , that partitions the points in  $\mathcal{X}$  that reach  $v$  into two sets: those having the coordinate  $i_v$  smaller than or equal to  $\theta_v$  and those having it larger than  $\theta_v$ . The leaves of a standard decision tree induce a partition of  $\mathbb{R}^d$  into axis-aligned boxes and, naturally, a partition of  $\mathcal{X}$  into clusters.

Let  $k \geq 2$  be an integer. The clustering problems considered here consist of finding a partition of  $\mathcal{X}$  into  $k$  groups, among those that can be induced by a standard decision tree with  $k$  leaves, that optimizes a given objective function. For  $k$ -means,  $k$ -medians and  $k$ -centers, in addition to the partition, a representative  $\mu(C) \in \mathbb{R}^d$  for each group  $C$  must also be output.

For the  $k$ -means problem the objective (cost function) to be minimized is the Sum of the Squared Euclidean Distances (SSED) between each point  $\mathbf{x} \in \mathcal{X}$  and the representative of the cluster where  $\mathbf{x}$  lies. Mathematically, the cost (SSED) of a partition  $\mathcal{C} = (C_1, \dots, C_k)$  for  $\mathcal{X}$  is given by

$$\text{cost}(\mathcal{C}) = \sum_{i=1}^k \sum_{\mathbf{x} \in C_i} \|\mathbf{x} - \mu(C_i)\|_2^2.$$

The  $k$ -medians and the  $k$ -centers problems are also minimization problems. For the former, the cost of a partition  $\mathcal{C} = (C_1, \dots, C_k)$  is given by

$$\text{cost}(\mathcal{C}) = \sum_{i=1}^k \sum_{\mathbf{x} \in C_i} \|\mathbf{x} - \mu(C_i)\|_1,$$

while for the latter it is given by

$$\text{cost}(\mathcal{C}) = \max_{i=1, \dots, k} \max_{\mathbf{x} \in C_i} \{\|\mathbf{x} - \mu(C_i)\|_2\}.$$

The maximum-spacing problem is a maximization problem for which the objective to be maximized is the spacing  $sp(\mathcal{C})$  of a partition  $\mathcal{C}$ , defined as

$$sp(\mathcal{C}) = \min\{\|\mathbf{x} - \mathbf{y}\|_2 : \mathbf{x} \text{ and } \mathbf{y} \text{ lie in distinct groups of } \mathcal{C}\}$$

We note that an optimal solution of the unrestricted version of any of these problems, in which the decision tree constraint is not enforced, might be a partition that is hard to explain in terms of the input features. Thus, the motivation for using decision trees.

Along the lines of [25], we define the price of explainability  $\rho(\mathcal{P})$  for a clustering problem  $\mathcal{P}$ , with a minimization objective function, as

$$\rho(\mathcal{P}) = \max_I \left\{ \frac{OPT_{exp}(I)}{OPT_{unr}(I)} \right\},$$

where  $I$  runs over all instances of  $\mathcal{P}$ ;  $OPT_{exp}(I)$  is the cost of an optimal explainable clustering (via standard decision trees) for instance  $I$  and  $OPT_{unr}(I)$  is the cost of an optimal unrestricted clustering for  $I$ . If  $\mathcal{P}$  has a maximization objective function, then  $\rho(\mathcal{P})$  is defined as

$$\rho(\mathcal{P}) = \max_I \left\{ \frac{OPT_{unr}(I)}{OPT_{exp}(I)} \right\}.$$

## 1.2 Our Contributions

We provide bounds on the price of explainability as a function of the parameters  $k$ ,  $d$  and  $n$  for the aforementioned objective functions. These objectives cover a spectrum that includes both intra- and inter-clustering criteria as well as worst-case and average-case measures.

First, we address the  $k$ -centers problem. We show that

$$\rho(k\text{-centers}) \in \begin{cases} \Omega(k^{1-1/d}), & \text{if } d \leq \frac{\ln k}{\ln \ln k} \\ \Omega\left(\sqrt{d} \cdot \frac{k \cdot \sqrt{\ln \ln k}}{\ln^{1.5} k}\right), & \text{otherwise} \end{cases}$$

and that  $\rho(k\text{-centers})$  is  $O(\sqrt{d}k^{1-1/d})$ . Our bounds are tight, up to constant factors, when  $d$  is a constant. For an arbitrary  $d$ , there is only a polylogarithmic gap in  $k$  between the upper and the lower bounds. The magnitude of this gap is exponentially smaller than that of these bounds.

For the  $k$ -medians it is known that the price of explainability is  $O(k)$  and  $\Omega(\log k)$  [25]. We contribute to the state of the art by showing that  $O(d \log k)$  is also an upper bound – an exponential improvement for constant dimensions. The upper bound follows from an interesting connection with the literature of binary searching in the presence of non-uniform testing costs [7, 20, 11].

For the  $k$ -means problem, we also improve, for low dimensions, the  $O(k^2)$  bound from [25] since we prove that  $\rho(k\text{-means})$  is  $O(kd \log k)$ . Still, for the  $k$ -means problem, we also give a more practice-oriented contribution by devising and evaluating a simple and efficient greedy algorithm. Our method outperformed the IMM method from [25] on an empirical study involving 10 real datasets. It should be noticed that IMM is a strong baseline since it got the best results against 5 other competitors on the same datasets according to [12, 15].

Finally, for maximum-spacing we provide a tight bound by showing that the price of explainability is  $\Theta(n - k)$ . The lower bound is particularly interesting since it shows that this objective function is bad for guiding explainable clustering, losing much more than the other considered objectives in the worst-case.

To derive our upper bounds, we analyze polynomial-time algorithms that start with an optimal  $k$ -clustering and transform it into an explainable one. The unrestricted versions of all the problems considered here, except for the maximum-spacing problem, are NP-Hard [24, 1]. However, all of them admit polynomial-time algorithms with constant approximation [32, 18] and, hence, if we start with the partitions given by them, instead of the optimal ones, we obtain efficient algorithms with provable approximation guarantees. These guarantees are exactly the upper bounds that we prove on the price of explainability.

We believe that our results are helpful for the construction of explainable clustering solutions as well as for guiding the choice of an objective function when explainability is required.

## 1.3 Related Work

Our research is inspired by the recent work of [25], where they propose an algorithm, namely IMM, for building explainable clusterings, via standard decision trees, for both the  $k$ -means

and the  $k$ -medians problems. At each node IMM selects the cut that minimizes the number of points separated from their representatives in a reference clustering. Our approach for these problems, while similar, uses a significantly different strategy to build the final decision tree, based on trees that look at a single dimension of the data. Moreover, as mentioned before, our algorithms provide better upper bounds for low dimensions.

Decision trees have long been associated to hierarchical agglomerative clustering (HAC), which produces a hierarchy of clusters that is usually represented by a dendrogram. Examples of models that explicitly use decision trees for HAC include [13, 8, 6, 3]. To our knowledge, the use of decision trees for non-hierarchical clustering was first suggested in [21], in which a standard classification tree is used to identify dense and sparse regions of data. In [14], unsupervised binary trees are also used to create interpretable clusters. More recently, an approach was presented in [5] using optimal classification trees [4], which are built in a single step by solving a mixed-integer optimization problem. For numerical databases, [22] presents a decision approach that decides on a split based on both the compactness of clusters and the separation between them.

The regions of space defined by decision-tree clustering will be hyper-rectangles (some of them may also be half-spaces if the overall region of interest is unbounded). Other approaches towards building hyper-rectangular clusters can be found in [27], with a generative model, and [10], with a discriminative one. Both models allow for probabilistic (soft) clustering, and [10] allows for incorporating previous knowledge to the model, but neither one guarantees that the resulting clusters can be represented by decision trees.

The main reason for using a (short) decision tree to build clusters is that the results of such algorithms are easily interpretable. Other avenues towards interpretable clustering have been explored in recent years. The technique presented in [28] is based on the information-theoretic concept of minimum description length. In [30], a tunable parameter (the fraction of elements in a cluster that share the same feature value) leverages the tradeoff between clustering performance and interpretability. The same tradeoff is explored in [15] by relaxing the requirement from [25] that the explainable clustering should be induced by a tree with no more than  $k$  leaves. In [17], a feature selection model from [16] is used for clustering interpretation in the field of wealth management compliance. [19] uses a two-step approach, rewriting  $k$ -means clustering models as neural networks and applying to these networks techniques for interpreting supervised learning models. More information regarding explainable clustering may be found in [9, 2].

Of all the works mentioned in this section, only [25] presents approximation guarantees with respect to the optimal unrestricted (i.e., potentially uninterpretable) solution. Two algorithms from [30] also have an approximation guarantee, but with respect to the optimal restricted (interpretable) solution, and the definition of interpretability in that work is quite different than ours (interpretable clusters are therein defined as those in which a given proportion of points share the same value for a predefined feature of interest).

## 2 On the Price of Explainability for the $k$ -centers problem

In this section we address the  $k$ -centers problem. We first present a lower bound by constructing an instance for which the price of explainability is high.

### 2.1 Lower Bound

Let  $p \leq \min\{d, \log_3 k\}$  be a positive integer whose exact value will be defined later in the analysis and let  $b$  be the largest integer for which  $b^p \leq k$ . Note that  $b \geq 3$ . Moreover, let  $k' = b^p$ .

Our instance  $I$  has  $k + k' \cdot 2d$  points. We first discuss how to construct the  $k$  points, referred as centers, that will be set as representatives in an unrestricted  $k$ -clustering for  $I$  that has a low cost. The first  $k'$  centers will be obtained from the representation of the numbers  $0, \dots, k' - 1$  in base  $b$  while the remaining  $k - k'$  centers will be located sufficiently far from the others so that they will be isolated in the low-cost  $k$ -clustering for  $I$ . Let  $\mathbf{c}^0, \dots, \mathbf{c}^{k'-1}$  be the first  $k'$  centers.

For a number  $i \in [k' - 1]$  let  $(i_{p-1}, \dots, i_0)_b$  be its representation in base  $b$ . For  $j \in [d]$ , the value of the  $j$ -th component of center  $\mathbf{c}^i$  is obtained by applying  $(j - 1)$  times a circular shift on  $(i_{p-1}, \dots, i_0)_b$ . The values of the remaining  $d - p$  components of  $\mathbf{c}^i$  are obtained by copying the  $p$  first values  $d/p$  times so that  $c_j^i = c_{j'}^i$  if  $(j - j') \bmod p = 0$ .

As an example, if  $b = 3$ ,  $p = 3$  and  $d = 9$  then  $\mathbf{c}^{14} = (14, 22, 16, 14, 22, 16, 14, 22, 16)$ . In fact, since  $14 = (1, 1, 2)_3$  we have that  $c_1^{14} = (1, 1, 2)_3 = 14$ ;  $c_2^{14} = (2, 1, 1)_3 = 22$  and  $c_3^{14} = (1, 2, 1)_3 = 16$ . The values of  $c_4^{14}, \dots, c_9^{14}$  are obtained by repeating the first 3 values.

The following observation is useful for our analysis.

**Fact 1.** *For every  $\ell \in [p]$ , the values of the  $\ell$ -th coordinate of the  $k'$  first centers are a permutation of the integers  $0, \dots, k' - 1$ .*

The remaining  $k - k'$  centers, as mentioned above, should be far from each other and also far away from the  $k'$  first centers. We can achieve that by setting  $\mathbf{c}^i = k^i \mathbf{1}$  for all  $i > k' - 1$ , where  $\mathbf{1}$  is the unit vector in  $\mathbb{R}^d$ .

The next lemma gives a lower bound on the distance between any two centers.

**Lemma 1.** *For any two centers  $\mathbf{c}^i$  and  $\mathbf{c}^j$ ,*

$$\|\mathbf{c}^i - \mathbf{c}^j\|_2 \geq \sqrt{\lfloor d/p \rfloor} \cdot (b^{p-1}/2).$$

*Proof.* If one of the two centers is not among the  $k'$  first centers the result clearly holds. Thus, we assume that  $i, j \leq k' - 1$ .

It is enough to show that there is  $\ell \in [p]$  for which  $|c_\ell^i - c_\ell^j| \geq b^{p-1}/2$ . In fact, if this inequality holds for some  $\ell$  then  $|c_{\ell'}^i - c_{\ell'}^j| \geq b^{p-1}/2$  for each  $\ell'$  that is congruent to  $\ell$  modulo  $p$ . Since there are  $\lfloor d/p \rfloor$  of them, due to our construction, we get the desired bound.

Let  $i = (i_{p-1}, \dots, i_0)_b$  and  $j = (j_{p-1}, \dots, j_0)_b$  be the representations of  $i$  and  $j$  in base  $b$ , respectively. Let  $f$  be such that  $|i_f - j_f|$  is maximum.

Thus, the difference between  $\mathbf{c}^i$  and  $\mathbf{c}^j$  in the coordinate  $[(f + 1) \bmod p] + 1$  is at least

$$|i_f - j_f| \cdot \left( b^{p-1} - \sum_{g=0}^{p-2} b^g \right) \geq b^{p-1}/2,$$

where the last inequality holds because  $|i_f - j_f| \geq 1$  and  $b \geq 3$ . □

Now, we define the remaining points of instance  $I$ .

For each of the first  $k'$  centers we create  $2d$  associated points:  $\mathbf{x}^{i,1}, \dots, \mathbf{x}^{i,2d}$ . For  $j = 1, \dots, d$ , the point  $\mathbf{x}^{i,2j-1}$  is identical to  $\mathbf{c}^i$  in all coordinates but on the  $j$ -th one, in which its value is  $c_j^i - 3/4$ . Similarly, the point  $\mathbf{x}^{i,2j}$  is identical to  $\mathbf{c}^i$  in all coordinates but in the  $j$ -th one, in which its value is  $c_j^i + 3/4$ . By considering the  $k$ -clustering for  $I$  where the  $k$  representatives are the  $k$  centers  $\mathbf{c}^0, \dots, \mathbf{c}^{k-1}$  and each point  $\mathbf{x}^{i,j}$  lies in the group of  $\mathbf{c}^i$ , we obtain the following proposition.

**Proposition 1.** *There exists an unrestricted  $k$ -clustering for instance  $I$  with cost  $3/4$ .*

Now we analyse the cost of an optimal explainable clustering for  $I$ . The following proposition is a simple consequence of Fact 1.

**Proposition 2.** *Let  $(j, \theta)$  be a cut that separates at least two points from the set  $A$  that includes the  $k'$  first centers and its associated  $k' \cdot 2d$  points. Then,  $(j, \theta)$  separates one point from its associated center.*

*Proof.* Since  $(j, \theta)$  separates at least two points from  $A$  then  $\theta \in (-3/4, k' - 1 + 3/4)$ .

If  $\theta < 0$ , then  $(j, \theta)$  separates the center that has the  $j$ -th coordinate equal to 0 from its associated point that has coordinate  $j$  equal to  $-3/4$ . If  $\theta > k' - 1$ , then  $(j, \theta)$  separates the center that has the  $j$ -th coordinate equal to 0 from its associated point that has coordinate  $j$  equal to  $k' - 1 + 3/4$ . Let  $z$  be an integer that satisfies  $0 \leq z \leq k' - 2$  and such that  $\theta \in (z, z + 1)$ . If  $\theta - z < 1/2$  (resp.  $\theta - z > 1/2$ ),  $(j, \theta)$  separates the center that has the  $j$ -th coordinate equal to  $z$  (resp.  $z + 1$ ) from its associated point with  $j$ -th coordinate equal to  $z + 3/4$  (resp.  $z + 1 - 3/4$ ).

Note that the existence of centers with the aforementioned values for coordinate  $j$  is guaranteed by Fact 1.  $\square$

**Lemma 2.** *Any explainable  $k$ -clustering for instance  $I$  has cost at least  $\sqrt{\lfloor d/p \rfloor} \cdot (b^{p-1}/4) - 3/8$ .*

*Proof.* Let  $\mathcal{C}$  be an explainable  $k$ -clustering for instance  $I$ . It is enough to show that there is a cluster  $C \in \mathcal{C}$  that contains two points, say  $\mathbf{x}$  and  $\mathbf{y}$ , for which

$$\|\mathbf{x} - \mathbf{y}\|_2 \geq \sqrt{\lfloor d/p \rfloor} \cdot (b^{p-1}/2) - 3/4.$$

In fact, in this case, due to the triangle inequality, for any choice of the representative for  $C$ , either  $\mathbf{x}$  or  $\mathbf{y}$  will be at distance at least  $\sqrt{\lfloor d/p \rfloor} \cdot (b^{p-1}/4) - 3/8$  from it.

If two centers lie in the same cluster of  $\mathcal{C}$  then it follows from Lemma 1 that their distance is at least  $\sqrt{\lfloor d/p \rfloor} \cdot (b^{p-1}/2)$ .

On the other hand, if every center lies on a different cluster in  $\mathcal{C}$  then let  $\mathbf{x}$  be the point that was separated from its center, say  $\mathbf{c}^i$ , by a cut that satisfies the condition of Proposition 2. Then,  $\mathbf{x}$  lies in the same cluster of  $\mathbf{c}^j$ , for some  $j \neq i$ . From the triangle inequality we have that

$$\|\mathbf{c}^i - \mathbf{c}^j\|_2 \leq \|\mathbf{c}^i - \mathbf{x}\|_2 + \|\mathbf{c}^j - \mathbf{x}\|_2.$$

Hence,  $\|\mathbf{c}^j - \mathbf{x}\|_2 \geq \sqrt{\lfloor d/p \rfloor} \cdot (b^{p-1}/2) - 3/4$ .  $\square$

By putting together Proposition 1 and Lemma 2 and, then, optimizing the value of  $p$  we obtain the following theorem.

**Theorem 1.** *The price of explainability for the  $k$ -centers problem satisfies*

$$\rho(k\text{-center}) \in \begin{cases} \Omega(k^{1-1/d}), & \text{if } d \leq \frac{\ln k}{\ln \ln k} \\ \Omega\left(\sqrt{d} \cdot \frac{k \cdot \sqrt{\ln \ln k}}{\ln^{1.5} k}\right), & \text{otherwise.} \end{cases}$$

*Proof.* Proposition 1 assures the existence of a  $k$ -clustering of cost  $3/4$  for instance  $I$ . Let  $\mathcal{C}$  be an explainable clustering for  $I$  and recall that  $b^p = k'$ . It follows from the previous lemma that

$$\text{cost}(\mathcal{C}) \geq \sqrt{\frac{d}{p}} \cdot \frac{b^{p-1}}{4} - 3/8 = \sqrt{\frac{d}{p}} \cdot \frac{(k')^{\frac{p-1}{p}}}{4} - 3/8.$$

Since  $(b+1)^p > k$  we have

$$k' > \frac{k}{(1+1/b)^p} > \frac{k}{\exp(p/b)}.$$

Thus,

$$\text{cost}(\mathcal{C}) \geq \sqrt{\frac{d}{p}} \cdot \frac{k^{\frac{p-1}{p}}}{4 \exp((p-1)/b)} - 3/8.$$

Now we set  $p = d$  if  $d \leq \frac{\ln k}{\ln \ln k}$  and  $p = \frac{\ln k}{\ln \ln k}$ , otherwise. Since  $b > k^{1/p} - 1$  we have that  $b > \ln k - 1 > p - 1$  for both cases and, hence,

$$\text{cost}(\mathcal{C}) \geq \sqrt{\frac{d}{p}} \cdot \frac{k^{\frac{p-1}{p}}}{4} - 3/8.$$

By replacing  $p$  in the previous equation according to each of the cases we obtain the desired result.  $\square$

## 2.2 Upper bound

In this section we show that the price of explainability for the  $k$ -center problem is  $O\left(\sqrt{d}k^{\frac{d-1}{d}}\right)$ . Note that, for constant  $d$ , the upper bound matches the lower bound given by Theorem 1.

To obtain the upper bound we analyze the cost of the explainable clustering induced by the decision tree built by the algorithm presented in Algorithm 1.

The algorithm has access to the set of representatives of an optimal  $k$ -clustering  $\mathcal{C}^*$  for  $\mathcal{X}$ . These representatives are used as *reference centers* for the points in  $\mathcal{X}$ , that is, the reference center of a point  $\mathbf{x}$  is the representative of  $\mathbf{x}$ 's group in  $\mathcal{C}^*$ .

Let  $\mathcal{X}'$  and  $S$  be, respectively, the subset of points in  $\mathcal{X}$  and the set of reference centers that reach a given node  $u$ . To split  $u$ , as long as it is possible, the algorithm applies an axis-aligned cut that does not separate any point  $\mathbf{x} \in \mathcal{X}'$  from its reference center. This type of cut is referred as a *clean cut* with respect to  $(\mathcal{X}', S)$ . When there is no such cut available for  $u$ , the algorithm partitions the bounding box of the points in  $\mathcal{X}' \cup S$  into  $\lfloor |S|^{1/d} \rfloor^d$  axis-aligned boxes of the same dimensions by using a decision tree that emulates a grid. By the bounding box of  $\mathcal{X}' \cup S$  we mean the smallest box (hyper-rectangle) with axis-aligned sides that includes the points in  $\mathcal{X}' \cup S$ .

---

### Algorithm 1 Ex-kCenter( $\mathcal{X}'$ : set of points)

---

```

 $S \leftarrow$  reference centers of the points in  $\mathcal{X}'$ 
if  $|S| = 1$  then
    Return  $\mathcal{X}'$  and the single reference center in  $S$ 
else
    if there exists a clean cut w.r.t.  $(\mathcal{X}', S)$  then
         $(\mathcal{X}'_L, \mathcal{X}'_R) \leftarrow$  partition induced by the clean cut
        Create a node  $u$ 
         $u.\text{LeftChild} \leftarrow$  Ex-kCenter( $\mathcal{X}'_L$ )
         $u.\text{RightChild} \leftarrow$  Ex-kCenter( $\mathcal{X}'_R$ )
        Return the tree rooted at  $u$ 
    else
         $H \leftarrow$  bounding box for  $\mathcal{X}' \cup S$ 
         $D^u \leftarrow$  decision tree that partitions  $H$  into  $\lfloor |S|^{1/d} \rfloor^d$  identical axis-aligned boxes
        Return  $D^u$  as well as an arbitrarily chosen representative for each of its leaves
    end if
end if

```

---

**Theorem 2.** *The price of explainability for  $k$ -centers is  $O\left(\sqrt{d}k^{1-1/d}\right)$ .*

*Proof.* We argue that for each leaf  $\ell$  of the tree  $\mathcal{D}$  built by  $\text{Ex-kCenter}(\mathcal{X})$ , the maximum distance between a point in  $\ell$  and its representative is  $OPT\sqrt{dk}^{1-1/d}$ , where  $OPT$  is the cost of the optimal unrestricted clustering.

We split the proof into two cases. The first case addresses the scenario in which only clean cuts are used in the path from the root of  $\mathcal{D}$  to the leaf  $\ell$ . The second case addresses the remaining scenarios.

*Case 1.* In this case all points that reach  $\ell$  lie in the same cluster of the optimal unrestricted  $k$ -clustering  $\mathcal{C}^*$ . Thus, the maximum distance from a point in  $\ell$  to the single reference center in  $S$  is upper bounded by  $OPT$ .

*Case 2.* Let  $u$  be the first node in the path from the root to  $\ell$  for which a clean cut is not available. Moreover, let  $\mathcal{X}^u$  be the set of points that reach  $u$  and let  $s = |S|$ , that is, the number of reference centers that reach  $u$ . In this case the algorithm splits the bounding box for  $\mathcal{X}^u \cup S$  into boxes of dimensions

$$\frac{L_1}{\lfloor s^{1/d} \rfloor} \times \dots \times \frac{L_d}{\lfloor s^{1/d} \rfloor},$$

where  $L_i$  is the difference between the maximum and minimum values of the  $i$ -th coordinate among points in  $\mathcal{X}^u \cup S$ .

The maximum distance between a point in  $\ell$  and its representative can be upper bounded by the length of the diagonal of the axis-aligned box corresponding to  $\ell$ . Let  $m \in [d]$  be such that  $L_m = \max\{L_1, \dots, L_d\}$ . Then, the length of the diagonal is upper bounded by  $L_m\sqrt{d}/\lfloor s^{1/d} \rfloor \leq 2L_m\sqrt{d}/s^{1/d}$ .

Thus, it suffices to show that  $OPT \geq L_m/(2s)$ . Let  $\mathbf{c}^1, \dots, \mathbf{c}^s$  be the  $s$  reference centers that reach node  $u$ . In addition, let  $\mathbf{x}^j$  be a point in  $\mathcal{X}^u$  with reference center  $\mathbf{c}^j$  and such that  $|x_m^j - c_m^j|$  is maximum, among the points in  $\mathcal{X}^u$  with reference center  $\mathbf{c}^j$ . Then, we must have

$$\sum_{j=1}^s 2|x_m^j - c_m^j| \geq L_m,$$

for otherwise there would be a clean cut  $(m, \theta)$ , with  $\theta \in [a, b]$ , where  $a = \min\{y_m | \mathbf{y} \in \mathcal{X}^u \cup S\}$  and  $b = \max\{y_m | \mathbf{y} \in \mathcal{X}^u \cup S\}$ . Hence, for some point  $\mathbf{x}^j$ ,  $|x_m^j - c_m^j| \geq L_m/(2s)$ . Since  $OPT \geq |x_m^j - c_m^j|$  we get that  $OPT \geq L_m/(2s)$ .  $\square$

### 3 Improved Bounds on $k$ -medians for low dimensions

We show that the price of explainability for  $k$ -medians is  $O(d \log k)$ , which improves the bound from [25] when  $d = o(k/\log k)$ .

As in the previous section we use an optimal unrestricted  $k$ -clustering  $\mathcal{C}^*$  for  $\mathcal{X}$  as a guide for building an explainable clustering. Again, by the reference center of a point  $\mathbf{x} \in \mathcal{X}$  we mean its representative in  $\mathcal{C}^*$ .

We need some additional notation. For a decision tree  $\mathcal{D}$  and a node  $u \in \mathcal{D}$ , let  $\text{diam}(u)$  be the  $d$ -dimensional vector whose  $i$ -th coordinate  $\text{diam}(u)_i$  is given by the difference between the maximum and the minimum values of coordinate  $i$  among the reference centers that reach  $u$ . Let  $t_u$  be the number of points that reach  $u$  and are separated from their reference centers by the cut employed in  $u$ . Note that a point  $\mathbf{x} \in \mathcal{X}$  can only contribute to  $t_u$  if both  $\mathbf{x}$  and its reference center reach  $u$ . Finally, we use  $OPT$  to denote the cost of the optimal unrestricted clustering  $\mathcal{C}^*$ .

The following lemma from [25], expressed in our notation, will be useful.



**Lemma 3.** [25] *Let  $\mathcal{C}^*$  be an optimal unrestricted  $k$ -clustering for  $\mathcal{X}$  and let  $\mathcal{D}$  be a decision tree for  $\mathcal{X}$  in which each representative of  $\mathcal{C}^*$  lies in a distinct leaf. Then, the clustering  $\mathcal{C}$  induced by  $\mathcal{D}$  satisfies*

$$\text{cost}(\mathcal{C}) \leq \text{OPT} + \sum_{u \in \mathcal{D}} t_u \| \text{diam}(u) \|_1. \quad (1)$$

In order to obtain a low-cost explainable clustering we focus on finding a decision tree  $\mathcal{D}$  for which the rightmost term of the above inequality is small. This is the approach taken by IMM [25], a greedy strategy that at each node  $u$  selects the cut that yields the minimum possible value for  $t_u$ .

Although we follow the same approach, our strategy for building the tree is significantly different. In order to explain it, we first rewrite the rightmost term of (1):

$$\sum_{u \in \mathcal{D}} t_u \| \text{diam}(u) \|_1 = \sum_{i=1}^d \sum_{u \in \mathcal{D}} t_u \text{diam}(u)_i. \quad (2)$$

Motivated by Lemma 3 and the above identity, our strategy constructs  $d$  decision trees  $\mathcal{D}_1, \dots, \mathcal{D}_d$ , where  $\mathcal{D}_i$  is built with the aim of minimizing

$$\sum_{u \in \mathcal{D}} t_u \text{diam}(u)_i, \quad (3)$$

ignoring the impact on the coordinates  $j \neq i$ .

Next, it constructs a decision tree  $\mathcal{D}$  for  $\mathcal{X}$  by picking nodes from these  $d$  trees. More precisely, to split a node  $u$  of  $\mathcal{D}$  the strategy first selects a coordinate  $i \in [d]$  for which  $\text{diam}(u)_i$  is maximum. Next, it applies the cut that is associated with the node in  $\mathcal{D}_i$  which is the least common ancestor (LCA) of the set of reference centers that reach  $u$ .

In the pseudo-code presented in Algorithm 2,  $S'$  is a subset of the set  $S$  of representatives of  $\mathcal{C}^*$ . Moreover,  $\mathcal{X}'$  is a subset of the points in  $\mathcal{X}$ . The procedure is called, initially, with  $\mathcal{X}' = \mathcal{X}$  and  $S' = S$ .

---

**Algorithm 2** BuildTree( $\mathcal{X}' \cup S'$ )

---

```

Create a node  $u$  and associate it with  $\mathcal{X}' \cup S'$ 
if  $|S'| = 1$  then
  Return the leaf  $u$ 
else
  Select  $i \in [d]$  for which  $\text{diam}(u)_i$  is maximum.
   $v \leftarrow$  node in  $\mathcal{D}_i$  which is the LCA of the centers in  $S'$ 
  Split  $\mathcal{X}' \cup S'$  into  $\mathcal{X}'_L \cup S'_L$  and  $\mathcal{X}'_R \cup S'_R$  using the cut associated with  $v$ .
   $u.\text{LeftChild} \rightarrow \text{BuildTree}(\mathcal{X}'_L \cup S'_L)$ 
   $u.\text{RightChild} \rightarrow \text{BuildTree}(\mathcal{X}'_R \cup S'_R)$ 
  Return the decision tree rooted at  $u$ 
end if

```

---

To fully specify the algorithm we need to explain how the decision trees  $\mathcal{D}_i$  are built. Let  $\mathbf{c}^1, \dots, \mathbf{c}^k$  be the reference centers sorted by coordinate  $i$ , that is,  $c_i^j < c_i^{j+1}$  for  $j = 1, \dots, k-1$ . Moreover, let  $(i, \theta^j)$  be the cut that separates the points in  $\mathcal{X}$  with the  $i$ -th coordinate smaller than or equal to  $\theta^j = (c_i^j + c_i^{j+1})/2$  from the remaining ones.

For  $1 \leq a \leq b \leq k$ , let  $\mathcal{F}_{a,b}$  be the family of binary decision trees with  $(b-a)$  internal nodes and  $b-a+1$  leaves defined as follows:

- (i) if  $a = b$ , then  $\mathcal{F}_{a,b}$  has a single tree and this tree contains only one node.

- (ii) if  $a < b$ , then  $\mathcal{F}_{a,b}$  consists of all the decision trees  $\mathcal{D}'$  with the following structure: the root of  $\mathcal{D}'$  is identified by a number  $j \in \{a, \dots, b-1\}$  and associated with the cut  $(i, \theta^j)$ ; one child of the root of  $\mathcal{D}'$  is a tree in the family  $\mathcal{F}_{a,j}$  while the other is a tree in  $\mathcal{F}_{j+1,b}$ .

For our analysis, in the next sections, it will be convenient to view  $\mathcal{F}_{a,b}$  as the family of binary search trees for the numbers in the set  $\{a, \dots, b-1\}$ .

Let  $T_j$  be the number of points in  $\mathcal{X}$  that are separated from their centers by cut  $(i, \theta^j)$ . For every tree  $\mathcal{D}' \in \mathcal{F}_{a,b}$  we define  $UB_i(\mathcal{D}')$  as

$$UB_i(\mathcal{D}') = \sum_{j=a}^{b-1} T_j \cdot \text{diam}(j)_i,$$

where  $\text{diam}(j)$  is the diameter of the node identified by  $j$  in  $\mathcal{D}'$ .

The tree  $\mathcal{D}_i$  is, then, defined as

$$\mathcal{D}_i = \operatorname{argmin}\{UB_i(\mathcal{D}') \mid \mathcal{D}' \in \mathcal{F}_{1,k}\}.$$

The motivation for minimizing  $UB_i()$  is that for every tree  $\mathcal{D}' \in \mathcal{F}_{1,k}$ ,  $UB_i()$  is an upper bound on (3), that is,

$$\sum_{u \in \mathcal{D}'} t_u \text{diam}(u)_i \leq \sum_{j=1}^{k-1} T_j \cdot \text{diam}(j)_i = UB_i(\mathcal{D}').$$

To see that, let  $j$  be the integer identified with the node  $u \in \mathcal{D}'$ . By definition  $\text{diam}(u)_i = \text{diam}(j)_i$ . Moreover, we have  $t_u \leq T_j$  because  $t_u$  only accounts the points that are separated from their reference centers among those that reach  $u$ , while  $T_j$  accounts all the points in  $\mathcal{X}$  regardless of whether they reach  $u$  or not.

We discuss how to construct  $\mathcal{D}_i$  efficiently. Let  $OPT_{a,b} = \min\{UB_i(\mathcal{D}') \mid \mathcal{D}' \in \mathcal{F}_{a,b}\}$ , if  $a < b$ , and let  $OPT_{a,b} = 0$  if  $a = b$ . Hence,  $UB_i(\mathcal{D}_i) = OPT_{1,k}$ . The following relation holds for all  $a < b$ :

$$OPT_{a,b} = \min_{a \leq j \leq b-1} \left\{ T_j (c_i^b - c_i^a) + OPT_{a,j} + OPT_{j+1,b} \right\}. \quad (4)$$

Thus, given a set of  $k$  reference centers and the values  $T_j$ 's,  $\mathcal{D}_i$  can be computed in  $O(k^3)$  time by solving equation (4), for  $a = 1$  and  $b = k$ , via standard dynamic programming techniques.

### 3.1 Approximation Analysis: Overview

We prove that the cost of the clustering induced by  $\mathcal{D}$  is  $O(d \log k) \cdot OPT$ . To reach this goal, we first show that

$$UB_i(\mathcal{D}_i) \leq 2 \log k \left( \sum_{j=1}^{k-1} (c_i^{j+1} - c_i^j) T_j \right). \quad (5)$$

The proof of this bound relies on the fact that  $\mathcal{D}_i$  can be seen as a binary search tree with non-uniform probing costs. We use properties of this kind of tree, in particular the one proved in [7] about its competitive ratio.

Let

$$OPT_i = \sum_{\mathbf{x} \in \mathcal{X}} |x_i - c(\mathbf{x})_i|$$

be the contribution of coordinate  $i$  to  $OPT$ , where  $c(\mathbf{x})$  is the reference center of  $\mathbf{x}$ . Our second step consists of showing that

$$\left( \sum_{j=1}^{k-1} (c_i^{j+1} - c_i^j) T_j \right) / 2 \leq OPT_i. \quad (6)$$

Roughly speaking, the proof of this bound consists of projecting the points of  $\mathcal{X}$  and the reference centers onto the axis  $i$  and then counting the number of times the interval  $[c_i^j, c_i^{j+1}]$  appears in the segments that connect points in  $\mathcal{X}$  to their reference centers. This is exactly the same line of reasoning employed to prove Lemma 6 from the supplementary version of [25].

At this point, from the two previous inequalities, we obtain

$$UB_i(\mathcal{D}_i) \leq 4 \log k \cdot OPT_i. \quad (7)$$

Finally, we prove that a factor of  $d$  is incurred when we build the tree  $\mathcal{D}$  from the nodes of the trees  $\mathcal{D}_1, \dots, \mathcal{D}_d$ :

$$\sum_{v \in \mathcal{D}} t_v \|diam(v)\|_1 \leq d \sum_{i=1}^d UB_i(\mathcal{D}_i). \quad (8)$$

From (7), (8) and the identity  $OPT = \sum_{i=1}^d OPT_i$ , we obtain

$$\sum_{v \in \mathcal{D}} t_v \|diam(v)\|_1 \leq 4d \log k \cdot OPT.$$

This together with Lemma 3 allows us to establish the main theorem of this section.

**Theorem 3.** *The price of explainability for  $k$ -medians is  $O(d \log k)$ .*

### 3.2 Approximation Analysis: Proofs

We start with the proof of inequality (5).

**Lemma 4.** *The tree  $\mathcal{D}_i$  satisfies*

$$UB_i(\mathcal{D}_i) \leq 2 \log k \left( \sum_{j=1}^{k-1} (c_i^{j+1} - c_i^j) T_j \right).$$

*Proof.* Let  $\mathcal{D}'$  be a tree in  $\mathcal{F}_{1,k}$ . By construction, the set of centers that reach the node in  $\mathcal{D}'$  identified by  $j$  is a contiguous subsequence of  $\mathbf{c}^1, \dots, \mathbf{c}^k$ . Let  $r(j)$  and  $s(j)$  be, respectively, the first and the last indexes of the centers of this subsequence. Thus,

$$UB_i(\mathcal{D}') = \sum_{j=1}^{k-1} T_j \cdot diam(j)_i = \sum_{j=1}^{k-1} T_j \sum_{\ell=r(j)}^{s(j)-1} (c_i^{\ell+1} - c_i^\ell). \quad (9)$$

We can show that the right-hand side of the above equation satisfies

$$\sum_{j=1}^{k-1} T_j \sum_{\ell=r(j)}^{s(j)-1} (c_i^{\ell+1} - c_i^\ell) = \sum_{\ell=1}^{k-1} (c_i^{\ell+1} - c_i^\ell) \cdot \sum_{j \in An(\ell, \mathcal{D}')} T_j, \quad (10)$$

where  $An(\ell, \mathcal{D}')$  is the set of nodes that are ancestors (including  $\ell$ ) of the node identified by  $\ell$  in  $\mathcal{D}'$ .

To see that, fix  $j, \ell \in [k-1]$ . The term  $T_j(c_i^{\ell+1} - c_i^\ell)$  contributes the left-hand side of (10) if the centers  $\mathbf{c}^\ell$  and  $\mathbf{c}^{\ell+1}$  reach the node  $j$  in  $\mathcal{D}'$ . This happens if and only if  $j$  is an ancestor of the node identified by  $\ell$  in  $\mathcal{D}'$ .

Now, we use Theorem 4.5 from [7]. It states that for any vector  $(p_1, \dots, p_k)$  of  $k$  non-negative real numbers there exists a binary search tree  $B$  having  $k$  nodes, with each of them associated with a number in  $[k]$ , that satisfies

$$\sum_{j \in An(\ell, B)} p_j \leq (\log k + o(\log k))p_\ell \leq 2 \log k \cdot p_\ell,$$

for every node  $\ell$  of  $B$ .

Let  $\mathcal{D}_c$  be a tree obtained via the result of [7] for the vector  $(T_1, \dots, T_{k-1})$ . It satisfies

$$\sum_{j \in An(\ell, \mathcal{D}_c)} T_j \leq 2 \log(k-1) \cdot T_\ell.$$

By using this inequality, (9) and (10), we get that

$$UB_i(\mathcal{D}_c) = \sum_{\ell=1}^{k-1} (c_i^{\ell+1} - c_i^\ell) \sum_{j \in An(\ell, \mathcal{D}_c)} T_j \leq 2 \log k \sum_{\ell=1}^{k-1} (c_i^{\ell+1} - c_i^\ell) T_\ell.$$

The result follows because the minimality of  $\mathcal{D}_i$  guarantees that  $UB_i(\mathcal{D}_i) \leq UB_i(\mathcal{D}_c)$ .  $\square$

Inequality (6) is formalized in the next lemma.

**Lemma 5.** *Let  $OPT_i$  be the contribution of the coordinate  $i$  for the cost of an optimal unrestricted clustering  $\mathcal{C}^*$ . Then,*

$$OPT_i = \sum_{\mathbf{x} \in \mathcal{X}} |x_i - c(\mathbf{x})_i| \geq \sum_{j=1}^{k-1} \frac{(c_i^{j+1} - c_i^j) T_j}{2}, \quad (11)$$

where  $c(\mathbf{x})$  is the reference center of  $\mathbf{x}$ .

*Proof.* Let  $\mathbf{c}^1, \dots, \mathbf{c}^k$  be the reference centers sorted by increasing order of coordinate  $i$ . Recall that  $\theta^j = (c_i^j + c_i^{j+1})/2$ . For every  $\mathbf{x} \in \mathcal{X}$ , let  $Cut(\mathbf{x}) = \{j | (i, \theta^j) \text{ separates } \mathbf{x} \text{ from } c(\mathbf{x})\}$ .

Fix  $\mathbf{x} \in \mathcal{X}$ . If  $j \in Cut(\mathbf{x})$  then either  $[c_i^j, \theta^j]$  or  $[\theta^j, c_i^{j+1}]$  is included in the real interval with endpoints  $x_i$  and  $c(\mathbf{x})_i$ . Thus, we have that

$$|x_i - c(\mathbf{x})_i| \geq \sum_{j \in Cut(\mathbf{x})} (c_i^{j+1} - c_i^j)/2$$

By adding the above inequality for all  $\mathbf{x} \in \mathcal{X}$  we conclude that the number of times that  $(c_i^{j+1} - c_i^j)/2$  contributes to the right-hand side, for every  $j \in [k-1]$ , is exactly the number of times that  $(i, \theta^j)$  separates a point  $\mathbf{x}' \in \mathcal{X}$  from its reference center  $c(\mathbf{x}')$ . This number is exactly  $T_j$ .  $\square$

Finally, we present the proof of inequality (8).

**Lemma 6.** *Let  $\mathcal{D}$  be the decision tree built by Algorithm 2. Then,*

$$\sum_{v \in \mathcal{D}} t_v \|diam(v)\|_1 \leq d \sum_{i=1}^d UB_i(\mathcal{D}_i).$$

*Proof.* For a node  $j \in \mathcal{D}_i$ , let  $S_{i,j}$  be the (possibly empty) set of nodes in the tree  $\mathcal{D}$  that correspond to  $j$ , that is, the nodes that use the cut associated with the node  $j$  from  $\mathcal{D}_i$ . We have

$$\sum_{v \in \mathcal{D}} t_v \|diam(v)\|_1 = \sum_{i=1}^d \sum_{j \in \mathcal{D}_i} \sum_{u \in S_{i,j}} t_u \|diam(u)\|_1. \quad (12)$$

Moreover, we have that

$$\sum_{u \in S_{i,j}} t_u \|diam(u)\|_1 \leq \sum_{u \in S_{i,j}} t_u \cdot d \cdot diam(u)_i \leq \quad (13)$$

$$\sum_{u \in S_{i,j}} d \cdot t_u \cdot \max_{u \in S_{i,j}} \{diam(u)_i\} \leq \sum_{u \in S_{i,j}} d \cdot t_u \cdot diam(j)_i, \quad (14)$$

where the first inequality in (13) holds because  $i$  is the coordinate for which the diameter of  $u$  is maximum and the inequality (14) holds because the set of centers in  $u$  is a subset of the set of centers that reach the node identified by  $j$  in  $\mathcal{D}_i$ .

**Claim 1.** *For a node  $u \in S_{i,j}$ , let  $\mathcal{X}_u \subseteq \mathcal{X}$  be the set of points that reach  $u$  in  $\mathcal{D}$ . Then,  $\mathcal{X}_u \cap \mathcal{X}_{u'} = \emptyset$  for every  $u, u' \in S_{i,j}$ , with  $u \neq u'$ .*

*Proof.* Let  $w$  be the least common ancestor of  $u'$  and  $u$  in  $\mathcal{D}$ . If  $w \notin \{u, u'\}$  then the cut associated with  $w$  splits  $\mathcal{X}_w$  into two disjoint regions, one of them containing  $\mathcal{X}_u$  and the other containing  $\mathcal{X}_{u'}$  so that  $\mathcal{X}_u$  and  $\mathcal{X}_{u'}$  are disjoint.

If  $w \in \{u, u'\}$  let us assume w.l.o.g. that  $w = u$ . In this case, the cut  $(i, \theta^j)$ , associated with  $u$ , splits  $\mathcal{X}_u$  into two regions, one of them containing all the reference centers that reach  $u'$ . These centers are contained in the set of reference centers of one of the children of  $j$  in  $\mathcal{D}_i$  and, hence, the LCA in  $\mathcal{D}_i$  of the set of centers that reach  $u'$  is not  $j$ , that is,  $u' \notin S_{i,j}$ . This contradiction shows that this case cannot occur.  $\square$

From the previous claim we get that

$$\sum_{u \in S_{i,j}} t_u \leq T_j.$$

It follows from (13)-(14) and the above inequality that

$$\sum_{u \in S_{i,j}} t_u \|diam(u)\|_1 \leq d \cdot T_j \cdot diam(j)_i.$$

Hence, it follows from (12) that

$$\begin{aligned} \sum_{v \in \mathcal{D}} t_v \|diam(v)\|_1 &\leq \sum_{i=1}^d \sum_{j \in \mathcal{D}_i} d \cdot T_j \cdot diam(j)_i = \\ &d \sum_{i=1}^d UB_i(\mathcal{D}_i). \end{aligned} \quad \square$$

## 4 The $k$ -means problem

### 4.1 Improved bounds for low dimensions

The result we obtained for the  $k$ -medians problem can be extended to the  $k$ -means problem:

**Theorem 4.** *The price of explainability for  $k$ -means is  $O(dk \log k)$ .*

From an algorithmic perspective, in order to establish the theorem, we only need to replace the definition of  $UB_i(\mathcal{D}')$  for a tree  $\mathcal{D}'$  in  $\mathcal{F}_{a,b}$  with

$$UB_i'(\mathcal{D}') = \sum_{j=a}^{b-1} T_j \cdot (\text{diam}(j)_i)^2.$$

Note that the only difference is the replacement of  $\text{diam}(j)_i$  with  $(\text{diam}(j)_i)^2$ . As a consequence, for the  $k$ -means problem, the tree  $\mathcal{D}_i$  is defined as the tree  $\mathcal{D}'$  in  $\mathcal{F}_{1,k}$  for which  $UB_i'(\mathcal{D}')$  is minimum. It can also be constructed via dynamic programming. Theorem 4 can be proved by using arguments similar to those employed to bound the price of explainability for  $k$ -medians. The following inequalities are, respectively, counterparts of the inequalities (1), (5), (6) and (8):

$$\text{cost}(\mathcal{C}) \leq OPT + \sum_{v \in \mathcal{D}} t_v \|\text{diam}(v)\|_2^2, \quad (15)$$

$$UB_i'(\mathcal{D}_i) \leq 2k \log k \left( \sum_{j=1}^{k-1} (c_i^{j+1} - c_i^j)^2 \cdot T_j \right), \quad (16)$$

$$\left( \sum_{j=1}^{k-1} (c_i^{j+1} - c_i^j)^2 \cdot T_j \right) / 2 \leq OPT_i, \quad (17)$$

$$\sum_{v \in \mathcal{D}} t_v \|\text{diam}(v)\|_2^2 \leq d \sum_{i=1}^d UB_i'(\mathcal{D}_i). \quad (18)$$

From the three last inequalities and the identity  $OPT = \sum_{i=1}^d OPT_i$ , we obtain

$$\sum_{v \in \mathcal{D}} t_v \|\text{diam}(v)\|_2^2 \leq 4dk \log k \cdot OPT.$$

This together with the inequality (15) allows us to establish Theorem 4.

Inequality (15) is proved in [25]. The validity of inequalities (17) and (18) can be established by using exactly the same arguments employed to prove their counterparts. More specifically, the proof of Lemma 5 can be used for the former while the proof of Lemma 6 can be used for the latter.

The inequality (16) incurs an extra factor of  $k$  with respect to its counterpart. In order to prove this inequality, we apply the arguments of the proof of Lemma 4. The only required adaptation consists of replacing Equation (9) with the inequality

$$UB_i'(\mathcal{D}_i) \leq k \sum_{j=1}^{k-1} T_j \cdot \sum_{\ell=r(j)}^{s(j)-1} (c_i^{\ell+1} - c_i^\ell)^2. \quad (19)$$

Inequality (19) holds because

$$UB'_i(\mathcal{D}_i) = \sum_{j=1}^{k-1} T_j \cdot (c_i^{s(j)} - c_i^{r(j)})^2,$$

and a simple application of Jensen's inequality assures that

$$(c_i^{s(j)} - c_i^{r(j)})^2 \leq k \sum_{\ell=r(j)}^{s(j)-1} (c_i^{\ell+1} - c_i^\ell)^2.$$

## 4.2 Ex-Greedy: a practical algorithm for explainable $k$ -means

We propose a simple greedy algorithm, denoted by **Ex-Greedy**, for building explainable clustering for the  $k$ -means problem. We provide evidence that it performs very well in practice.

The algorithm starts with the set  $S$  of representatives of an unrestricted  $k$ -clustering  $\mathcal{C}^{ini}$  for the dataset  $\mathcal{X}$  and then builds a decision tree  $\mathcal{D}$  with  $k$  leaves, where each of them includes exactly one representative from  $S$ .

Let  $u$  be a node of the decision tree and let  $\mathcal{X}^u$  and  $\mathcal{S}^u$  be, respectively, the set of points and the set of reference centers (representatives of  $\mathcal{C}^{ini}$ ) that reach  $u$ . We define the cost of a partition  $(L, R)$  of the points in  $\mathcal{X}^u \cup \mathcal{S}^u$  as

$$\begin{aligned} cost(L, R) = & \sum_{\mathbf{x} \in L \cap \mathcal{X}^u} \min_{\mathbf{c} \in L \cap \mathcal{S}^u} \|\mathbf{x} - \mathbf{c}\|_2^2 + \\ & \sum_{\mathbf{x} \in R \cap \mathcal{X}^u} \min_{\mathbf{c} \in R \cap \mathcal{S}^u} \|\mathbf{x} - \mathbf{c}\|_2^2. \end{aligned}$$

To split a node  $u$ , that is reached by more than one representative, **Ex-Greedy** selects the axis-aligned cut that induces a partition with minimum cost.

**Ex-Greedy** can be implemented in  $O(ndkH + nd \log n)$  time, where  $H$  is the depth of the resulting decision tree. Note that  $H \leq k$  and in many relevant applications  $k$  is small. The time complexity corresponds to  $H$  iterations of Lloyd's  $k$ -means algorithm.

### 4.2.1 An efficient implementation

To achieve this time complexity, in the preprocessing phase, **Ex-Greedy** builds the following data structures:

- a list  $\text{SL}_i$ , for each  $i \in [d]$ , containing the points in  $\mathcal{X} \cup S$  sorted by coordinate  $i$ ;
- a list  $\text{M}_\mathbf{x}$  of size  $k$ , for each  $\mathbf{x} \in \mathcal{X}$ , that stores the  $k$  centers sorted by increasing order of their distances to  $\mathbf{x}$ .

The lists  $\text{SL}_i$  can be built in  $O(dn \log n)$  time and the lists  $\text{M}_\mathbf{x}$  in  $O(nk \log k)$  time.

To decide how to split the root the algorithm finds the partition with minimum cost for each coordinate  $i \in [d]$  and then selects the one with minimum cost among them.

Fix  $i \in [d]$ . The algorithm scans the list  $\text{SL}_i$  from left to the right and evaluates the cost of  $n - k + 1$  partitions where the  $j$ -th one, namely  $(L_j, R_j)$ , separates the first  $j$  points in  $\text{SL}_i$  from the remaining ones. During the scan the algorithm makes use of two vectors of size  $n$ ,  $\mathbf{V}_L$  and  $\mathbf{V}_R$ . Right after evaluating  $(L_j, R_j)$ ,  $\mathbf{V}_L$  (resp.  $\mathbf{V}_R$ ) stores, for each  $\mathbf{x}$  that lies at  $L_j$  (resp.  $R_j$ ),

the center that is closest to  $\mathbf{x}$  among those that also lie in  $L_j$  (resp.  $R_j$ ). The only difference is that  $\mathbf{V}_L[\mathbf{x}]$  stores the center directly while  $\mathbf{V}_R[\mathbf{x}]$  stores the position of the center in  $\mathbf{M}_x$ .

Let us consider the moment in which the algorithm has just calculated the cost  $\mathbf{Cost}_j$  of the  $j$ th partition  $(L_j, R_j)$ . To obtain  $\mathbf{Cost}_{j+1}$  and update  $\mathbf{V}_L$  and  $\mathbf{V}_R$ , the algorithm first set  $\mathbf{Cost}_{j+1} = \mathbf{Cost}_j$  and then proceeds according to the following cases:

*Case 1.* The  $(j + 1)$ -th point in  $\mathbf{SL}_i$  corresponds to a point  $\mathbf{x}$  in  $\mathcal{X}$ . Then, the algorithm evaluates  $\mathbf{Cost}_{j+1}$  in  $O(k)$  time as follows:

- i it obtains the center  $\mathbf{c}_R$  in  $R_j$  that is closest to  $\mathbf{x}$ . This is done in  $O(1)$  time since  $\mathbf{V}_R[\mathbf{x}]$  points to this center;
- ii By scanning  $\mathbf{M}_x$  it obtains the center  $\mathbf{c}_L$  in  $L_{j+1}$  that is closest to  $\mathbf{x}$  and then updates  $\mathbf{V}_L[\mathbf{x}]$  to  $\mathbf{c}_L$ . This requires  $O(k)$  time
- iii it updates  $\mathbf{Cost}_{j+1}$  to  $\mathbf{Cost}_j + \|\mathbf{x} - \mathbf{c}_L\|_2^2 - \|\mathbf{x} - \mathbf{c}_R\|_2^2$ .

*Case 2.* The  $(j + 1)$ -th point in  $\mathbf{SL}_i$  corresponds to a reference center  $\mathbf{c}$  in  $S$ . Then, the algorithm evaluates  $\mathbf{Cost}_{j+1}$  in  $O(n)$  amortized time as follows:

- i for each point  $\mathbf{x}$  in  $L_j$ , **Ex-Greedy** compares  $\|\mathbf{c} - \mathbf{x}\|_2^2$  with  $\|\mathbf{V}_L[x] - \mathbf{x}\|_2^2$ . If  $\mathbf{c}$  is the closest then it updates  $\mathbf{Cost}_{j+1}$  to  $\mathbf{Cost}_{j+1} + \|\mathbf{x} - \mathbf{c}\|_2^2 - \|\mathbf{x} - \mathbf{V}_L[x]\|_2^2$  and  $\mathbf{V}_L[\mathbf{x}]$  to  $\mathbf{c}$ . This requires  $O(n)$  time.
- ii for each point  $\mathbf{x}$  in  $R_j$  it verifies whether  $\mathbf{V}_R[\mathbf{x}]$  points to  $\mathbf{c}$ . In the negative case, nothing is done. In the positive case, it scans  $\mathbf{M}_x$ , starting from  $\mathbf{V}_R[\mathbf{x}]$  towards to its end, until it finds a center  $\mathbf{c}'$  that lies in  $R_j$ . Then it updates  $\mathbf{Cost}_{j+1}$  to  $\mathbf{Cost}_j - \|\mathbf{x} - \mathbf{c}\|_2^2 + \|\mathbf{x} - \mathbf{c}'\|_2^2$ . This operation requires  $O(n)$  amortized time since the total cost spent on these scans, when we take into account moving the  $k$  centers, is  $O(nk)$ .

The algorithm applies the cut with minimum cost and then recurses on each the children of the root. To process a child  $u$  of the root, the implementation updates the data structures  $\mathbf{SL}_i$  and  $\mathbf{M}_x$  to only comprise the points and the reference center that reach  $u$ . Each list  $\mathbf{SL}_i$  can be updated in  $O(n)$  time by removing the points and the reference centers that do not reach  $u$ . Similarly, each list  $\mathbf{M}_x$  can be updated in  $O(k)$  time by removing points and the reference centers that do not reach  $u$ .

## 4.2.2 Experiments

[12, 15] compared 6 methods that build explainable clusterings, over 10 datasets. These methods also allow the construction of decision trees with more than  $k$  leaves but this is not relevant for our experiments. For trees with  $k$  leaves, the IMM algorithm proposed in [25] obtained the best results, or was very close to it, for all datasets but one (CIFAR-10).

Given the success of IMM, we compared it with our method **Ex-Greedy** on the same datasets. The column IMM (resp. **Ex-Greedy**) of Table 1 shows the average ratio between the cost of the clustering obtained by IMM (resp. **Ex-Greedy**) and that of the initial unrestricted clustering  $\mathcal{C}^{ini}$  produced by scikit-learn’s **KMeans** algorithm [26]. Following [15], the value of  $k$  is the number of classes for the classification task associated with the dataset.

Each dataset was run for 10 iterations, with random seeds from 1 to 10, to ensure the reproducibility of results. For each iteration, we initially achieve an unrestricted solution  $\mathcal{C}^{ini}$  by running the **KMeans** algorithm provided in the **scikit-learn** package with default parameters. We then pass  $\mathcal{C}^{ini}$  to the implementation of IMM from [15], available at <https://github.com/>



Table 1: Comparison of Ex-Greedy and IMM over 10 datasets

| Dataset      | n       | d     | k  | IMM  | Ex-Greedy   |
|--------------|---------|-------|----|------|-------------|
| BreastCancer | 569     | 30    | 2  | 1.00 | 1.00        |
| Iris         | 150     | 4     | 3  | 1.04 | 1.04        |
| Wine         | 178     | 13    | 3  | 1.00 | 1.00        |
| Covtype      | 581,012 | 54    | 7  | 1.03 | 1.03        |
| Mice         | 552     | 77    | 8  | 1.12 | <b>1.09</b> |
| Digits       | 1,797   | 64    | 10 | 1.23 | <b>1.21</b> |
| CIFAR-10     | 50,000  | 3,072 | 10 | 1.23 | <b>1.17</b> |
| Anuran       | 7,195   | 22    | 10 | 1.30 | <b>1.15</b> |
| Avila        | 20,867  | 12    | 12 | 1.1  | <b>1.09</b> |
| Newsgroups   | 18,846  | 1,069 | 20 | 1.01 | 1.01        |

Table 2: Average running times in seconds for Ex-Greedy and IMM

| Dataset    | IMM (sec) | Ex-Greedy (sec) |
|------------|-----------|-----------------|
| Avila      | 1.7       | 2.4             |
| Covtype    | 42        | 53              |
| Newsgroups | 41        | 102             |
| CIFAR-10   | 312       | 378             |

[navefr/ExKMC](#), and to our implementation of Ex-Greedy, to find two explainable clustering solutions induced by decision trees.

For 5 datasets, the results were very similar while for the others (bold in Table 1) Ex-Greedy performed better than IMM. Figure 1 presents box plots for the 5 datasets where there was a difference of at least 0.01 on the average results. It is interesting to note that the dispersion of Ex-Greedy is considerably smaller.

In terms of running time both methods spent less than 1 second, for 6 datasets. For the remaining datasets IMM was the fastest as shown in Table 2. In spite of that, we understand that Ex-Greedy is fast enough to be used in practice.

### 4.2.3 Details of the experimental settings and the datasets

All our experiments were executed in a MacBook Air, 8Gb of RAM, processor 1,6 GHz Dual-Core Intel Core i5, executing macOS Catalina, version 10.15.7. Our code is available in <https://github.com/lmurtinho/ExKMC>.

The datasets Iris, Wine, Breast Cancer, Digits, Covtype, Mice and Newsgroup are available in Python’s `scikit-learn`; Cifar-10 is available in TensorFlow; Anuran and Avila were downloaded from UCI.

For Mice, the examples with missing values were removed. For Avila, the training set and the testing set are used together. Finally, for Newsgroup, we removed headers, footers, quotes, stopwords, and words that either appear in less than 1% or more than 10% of the documents, following [15].

Figure 1: Box Plots for the datasets with difference at least 0.01

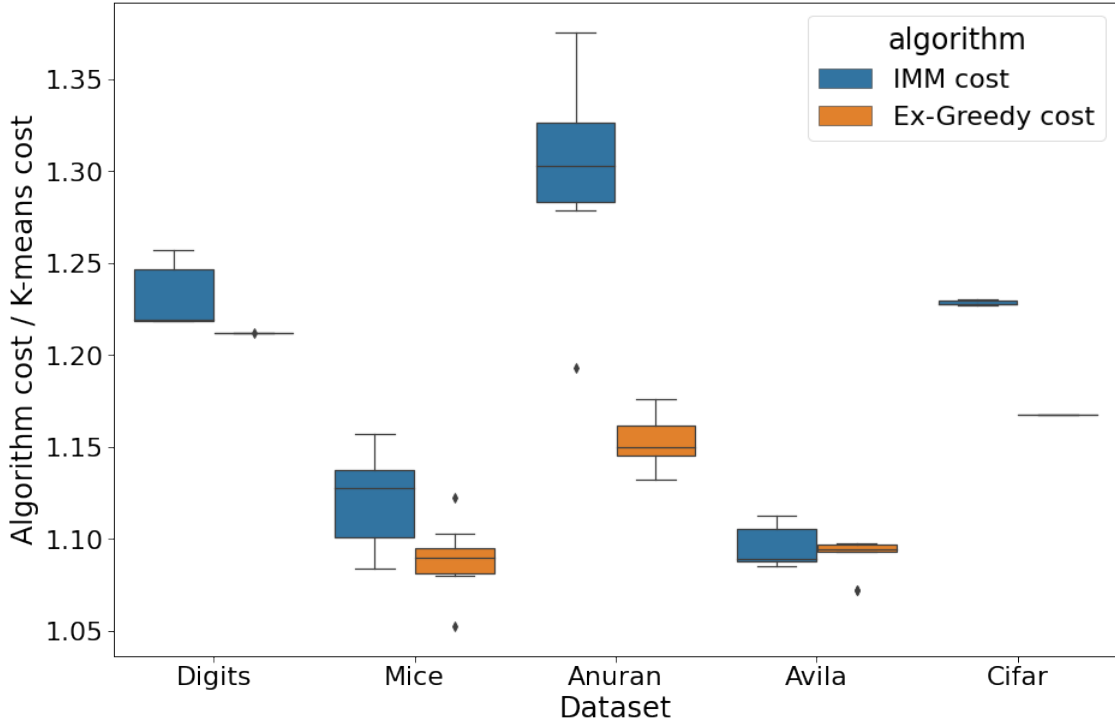

## 5 Maximum-Spacing Clustering

We show that the price of explainability for the maximum-spacing problem is  $\Theta(n - k)$ .

### 5.1 Lower bound

The following simple construction shows that the price of explainability is  $\Omega(n - k)$ .

Let  $C_1 = \{(0, i) | 0 \leq i \leq p\} \cup \{(i, 0) | 0 \leq i \leq p\}$ . Moreover, for  $i = 2, \dots, k$ , let  $C_i = \{(i - 1)(p - 1), (p - 1)\}$ . The dataset  $\mathcal{X}$  for our instance is given by  $C_1 \cup \dots \cup C_k$ .

The unrestricted  $k$ -clustering  $(C_1, \dots, C_k)$  has spacing  $p - 1 = (n - k)/2 - 1$ . On the other hand, every explainable  $k$ -clustering has spacing 1. To see that, note that we cannot have all the points of  $C_1 \cup C_2$  in the same cluster, for otherwise we would have at most  $k - 1$  clusters. Thus, we need to separate at least 2 points from  $C_1 \cup C_2$  and the only way to accomplish that, via axis-aligned cuts, forces the separation of 2 points in  $C_1$  that are at distance 1 from each other. Thus, the spacing will be 1.

**Lemma 7.** *The price of explainability for the maximum-spacing clustering problem is  $\Omega(n - k)$ .*

### 5.2 Upper Bound

We present an algorithm that always obtains an explainable clustering with spacing  $O((n - k)OPT)$ , where  $OPT$  is the spacing of the optimal unrestricted clustering. That, together with the previous lemma, implies that the price of explainability for the maximum-spacing problem is  $\Theta(n - k)$ .

Algorithm 3 receives an optimal  $k$ -clustering  $\mathcal{C}^*$  as input and uses it as a guide to transforming an initial single cluster containing all points of  $\mathcal{X}$  into an explainable  $k$ -clustering. The existence of cluster  $C$  at line (\*) follows from a simple pigeonhole argument. The motivation

for this choice is that  $C$  has two points at distance at least  $OPT$ , which is used to show the existence of a cut with a large enough margin.

---

**Algorithm 3** Ex-`SingleLink`( $\mathcal{X}$ )

---

$\mathcal{C}^* \leftarrow$  optimal unrestricted  $k$ -clustering for points in  $\mathcal{X}$ .  
 $\mathcal{C} \leftarrow$  single cluster containing all points of  $\mathcal{X}$   
**for**  $i = 1, \dots, k - 1$  **do**  
    Select a cluster  $C \in \mathcal{C}$  that contains two points that lie in different clusters in  $\mathcal{C}^*$ . (\*)  
    Split  $C$  using an axis-aligned cut that yields a 2-clustering  $(C', C'')$  with maximum possible spacing.  
    Remove  $C$  from  $\mathcal{C}$  and update  $\mathcal{C}$  to  $\mathcal{C} \cup \{C', C''\}$   
**end for**

---

**Lemma 8.** *Given a set of points  $\mathcal{X}$ , Ex-`SingleLink`( $\mathcal{X}$ ) obtains a  $k$ -clustering  $\mathcal{C}$  with spacing at least  $OPT/(n - k)$ , where  $OPT$  is the spacing of an optimal unrestricted clustering.*

*Proof.* First, we observe that it is always possible to properly execute line (\*) of Ex-`SingleLink`. In fact, if we pick  $k$  points covering all the  $k$  clusters of  $\mathcal{C}^*$  then, by the pigeonhole principle, two of them will lie in the same group in  $\mathcal{C}$  since  $\mathcal{C}$  has less than  $k$  groups when line (\*) is executed.

To establish the result it suffices to prove that there is always an axis-aligned cut that splits the selected cluster  $C$  into two clusters with spacing at least  $OPT/(n - k)$ .

Let  $\mathbf{p}$  and  $\mathbf{q}$  be two points in  $C$  that lie in distinct clusters in  $\mathcal{C}^*$  and let  $G = (V, E)$  be a graph, where  $V$  is the set of points in  $C$  and  $E$  connects points in  $V$  with distance smaller than  $OPT/(n - k)$ . Moreover, let  $F = (T_1, \dots, T_\ell)$  be a forest that is obtained by running Kruskal's MST algorithm on  $G$ .

**Claim 2.** *Points in  $C$  that belong to distinct clusters of  $\mathcal{C}^*$  must also belong to different trees in forest  $F$ .*

*Proof.* For the sake of contradiction we assume that the claim does not hold. In this case, there would be a path from  $\mathbf{p}$  to  $\mathbf{q}$  in  $F$  and this path would have an edge joining two points that belong to different clusters in  $\mathcal{C}^*$ , which cannot occur since their distance is at least  $OPT > OPT/(n - k)$ .  $\square$

The previous claim implies that  $\ell \geq 2$  since  $\mathbf{p}$  and  $\mathbf{q}$  belong to different clusters. We say that an axis-aligned cut is *good* with respect to a cluster  $C$  if it satisfies the following properties: (i) it separates the points in  $C$  into two non-empty clusters and (ii) it does not separate points that lie in the same tree of  $F$ . If a good cut exists, then we can use it to split  $C$  into two clusters with spacing at least  $OPT/(n - k)$  since, by construction, points in different trees have distance at least  $OPT/(n - k)$ . For the sake of contradiction let us assume that such a cut does not exist.

For each  $j \in [d]$  let  $I_j^{\mathbf{p}\mathbf{q}}$  be the real interval that starts in  $\min\{p_j, q_j\}$  and ends in  $\max\{p_j, q_j\}$ , that is,  $I_j^{\mathbf{p}\mathbf{q}} = [\min\{p_j, q_j\}, \max\{p_j, q_j\}]$ .

Moreover, for each tree  $T$  in  $F$ , let  $I_j^T$  be the interval that starts at  $\min\{x_j | \mathbf{x} \text{ is a node in } T\}$  and ends at  $\max\{x_j | \mathbf{x} \text{ is a node in } T\}$ . Finally, for each edge  $e = uv$  in  $F$  and each  $j \in [d]$ , let  $I_j^e$  be the real interval that starts at  $\min\{u_j, v_j\}$  and ends at  $\max\{u_j, v_j\}$ . For a real interval  $I$ , let  $len(I)$  be its length.

Since there are no good cuts, for  $j = 1, \dots, d$ , we have

$$\sum_{T \in F} len(I_j^T) \geq len(I_j^{\mathbf{p}\mathbf{q}}).$$

From the triangle inequality we obtain

$$\sum_{T \in F} \sum_{e \in T} \text{len}(I_j^e) \geq \sum_{T \in F} \text{len}(I_j^T).$$

From the two previous inequalities we get

$$\sum_{e \in F} \text{len}(I_j^e) = \sum_{T \in F} \sum_{e \in T} \text{len}(I_j^e) \geq \text{len}(I_j^{\mathbf{p}\mathbf{q}}).$$

A simple application of Jensen inequality shows that

$$\sum_{e \in F} \text{len}(I_j^e)^2 \geq \frac{(\text{len}(I_j^{\mathbf{p}\mathbf{q}}))^2}{f},$$

where  $f$  is the number of edges in  $F$ . By adding the above inequality for all  $j \in [d]$  we get

$$\sum_{e \in F} \|e\|_2^2 \geq \frac{1}{f} \|\mathbf{p} - \mathbf{q}\|_2^2 \geq \frac{OPT^2}{f},$$

where  $\|e\|_2$  is the distance between the two endpoints of edge  $e$ .

The last inequality implies  $\|e\|_2 \geq OPT/f$ , for some edge  $e$ . Thus, to obtain a contradiction, it suffices to show that  $f \leq n - k$ , since we cannot have edges in  $F$  with distance  $\geq OPT/(n - k)$ .

To see that  $f \leq n - k$ , let  $k'$  be the number of clusters in  $\mathcal{C}$  that are singletons and let  $S'$  be the set of points in these clusters. Moreover, let  $S \subseteq \mathcal{X} - S'$  be a set of  $k - k'$  points with each of them belonging to a different cluster in  $\mathcal{C}^*$ . Note that cluster  $C$  is not a singleton since  $\mathbf{p}, \mathbf{q} \in C$ . Since both  $C$  and  $S$  are subsets of  $\mathcal{X} - S'$  we have  $|C \cup S| = |C| + |S| - |C \cap S| \leq n - k'$  so that  $|C| - |C \cap S| \leq n - k$ . It follows from Claim 2 that the number of trees in  $F$  is at least  $|C \cap S|$  and, as a result, its number of edges  $f$  satisfies  $f \leq |C| - |C \cap S| - 1 < n - k$  edges.  $\square$

We can state the main result of this section.

**Theorem 5.** *The price of explainability for the maximum-spacing problem is  $\Theta(n - k)$ .*

## References

- [1] D. ALOISE, A. DESHPANDE, P. HANSEN, AND P. POPAT, *Np-hardness of euclidean sum-of-squares clustering*, Mach. Learn., 75 (2009), pp. 245–248.
- [2] E. BARALIS, D. E. PASTOR, AND M. CANNONE, *Explainable ai for clustering algorithms*.
- [3] J. BASAK AND R. KRISHNAPURAM, *Interpretable hierarchical clustering by constructing an unsupervised decision tree*, IEEE Transactions on Knowledge and Data Engineering, 17 (2005), pp. 121–132.
- [4] D. BERTSIMAS AND J. DUNN, *Optimal classification trees*, Machine Learning, 106 (2017), pp. 1039–1082.
- [5] D. BERTSIMAS, A. ORFANOUDAKI, AND H. WIBERG, *Interpretable clustering: an optimization approach*, Machine Learning, (2020), pp. 1–50.
- [6] H. BLOCKEEL, L. DE RAEDT, AND J. RAMON, *Top-down induction of clustering trees*, arXiv preprint cs/0011032, (2000).

- [7] M. CHARIKAR, R. FAGIN, V. GURUSWAMI, J. M. KLEINBERG, P. RAGHAVAN, AND A. SAHAI, *Query strategies for priced information*, J. Comput. Syst. Sci., 64 (2002), pp. 785–819.
- [8] M. CHAVENT, C. GUINOT, Y. LECHEVALLIER, AND M. TENENHAUS, *Méthodes divisives de classification et segmentation non supervisée: Recherche d’une typologie de la peau humaine saine*, Revue de statistique appliquée, 47 (1999), pp. 87–99.
- [9] J. CHEN, *Interpretable Clustering Methods*, PhD thesis, Northeastern University, 2018.
- [10] J. CHEN, Y. CHANG, B. HOBBS, P. CASTALDI, M. CHO, E. SILVERMAN, AND J. DY, *Interpretable clustering via discriminative rectangle mixture model*, in 2016 IEEE 16th International Conference on Data Mining (ICDM), IEEE, 2016, pp. 823–828.
- [11] F. CICALESE AND E. S. LABER.
- [12] S. DASGUPTA, N. FROST, M. MOSHKOVITZ, AND C. RASHTCHIAN, *Explainable k-means clustering: Theory and practice*, in XXAI: Extending Explainable AI Beyond Deep Models and Classifiers, 2020.
- [13] S. DASGUPTA, M. MOSHKOVITZ, C. RASHTCHIAN, AND N. FROST, *Explainable k-means and k-medians clustering*, in ICML, vol. 119 of Proceedings of Machine Learning Research, PMLR, 2020, pp. 7055–7065.
- [14] D. H. FISHER, *Knowledge acquisition via incremental conceptual clustering*, Machine learning, 2 (1987), pp. 139–172.
- [15] R. FRAIMAN, B. GHATTAS, AND M. SVARC, *Interpretable clustering using unsupervised binary trees*, Advances in Data Analysis and Classification, 7 (2013), pp. 125–145.
- [16] N. FROST, M. MOSHKOVITZ, AND C. RASHTCHIAN, *Exkmc: Expanding explainable k-means clustering*, arXiv preprint arXiv:2006.02399, (2020).
- [17] E. HOREL AND K. GIESECKE, *Computationally efficient feature significance and importance for machine learning models*, 2019.
- [18] E. HOREL, K. GIESECKE, V. STORCHAN, AND N. CHITTAR, *Explainable clustering and application to wealth management compliance*, 2020.
- [19] T. KANUNGO, D. M. MOUNT, N. S. NETANYAHU, C. D. PIATKO, R. SILVERMAN, AND A. Y. WU, *A local search approximation algorithm for k-means clustering*, Comput. Geom., 28 (2004), pp. 89–112.
- [20] J. KAUFFMANN, M. ESDERS, G. MONTAVON, W. SAMEK, AND K.-R. MÜLLER, *From clustering to cluster explanations via neural networks*, arXiv preprint arXiv:1906.07633, (2019).
- [21] E. S. LABER, R. L. MILIDIÚ, AND A. A. PESSOA, *On binary searching with nonuniform costs*, SIAM J. Comput., 31 (2002), pp. 1022–1047.
- [22] B. LIU, Y. XIA, AND P. S. YU, *Clustering through decision tree construction*, in Proceedings of the ninth international conference on Information and knowledge management, 2000, pp. 20–29.

- [23] O. LOYOLA-GONZÁLEZ, A. E. GUTIERREZ-RODRÍGUEZ, M. A. MEDINA-PÉREZ, R. MONROY, J. F. MARTÍNEZ-TRINIDAD, J. A. CARRASCO-OCHOA, AND M. GARCÍA-BORROTO, *An explainable artificial intelligence model for clustering numerical databases*, IEEE Access, 8 (2020), pp. 52370–52384.
- [24] S. M. LUNDBERG AND S.-I. LEE, *A unified approach to interpreting model predictions*, in Advances in neural information processing systems, 2017, pp. 4765–4774.
- [25] N. MEGIDDO AND K. J. SUPOWIT, *On the complexity of some common geometric location problems*, SIAM J. Comput., 13 (1984), pp. 182–196.
- [26] F. PEDREGOSA, G. VAROQUAUX, A. GRAMFORT, V. MICHEL, B. THIRION, O. GRISEL, M. BLONDEL, P. PRETTENHOFER, R. WEISS, V. DUBOURG, J. VANDERPLAS, A. PASSOS, D. COURNAPEAU, M. BRUCHER, M. PERROT, AND E. DUCHESNAY, *Scikit-learn: Machine learning in Python*, Journal of Machine Learning Research, 12 (2011), pp. 2825–2830.
- [27] D. PELLEGG AND A. MOORE, *Mixtures of rectangles: Interpretable soft clustering*, in ICML, 2001, pp. 401–408.
- [28] C. PLANT AND C. BÖHM, *Inconco: Interpretable clustering of numerical and categorical objects*, in Proceedings of the 17th ACM SIGKDD International Conference on Knowledge Discovery and Data Mining, KDD '11, New York, NY, USA, 2011, Association for Computing Machinery, p. 1127–1135.
- [29] M. T. RIBEIRO, S. SINGH, AND C. GUESTRIN, *“why should i trust you?” explaining the predictions of any classifier*, in Proceedings of the 22nd ACM SIGKDD international conference on knowledge discovery and data mining, 2016, pp. 1135–1144.
- [30] S. SAISUBRAMANIAN, S. GALHOTRA, AND S. ZILBERSTEIN, *Balancing the tradeoff between clustering value and interpretability*, in Proceedings of the AAAI/ACM Conference on AI, Ethics, and Society, 2020, pp. 351–357.
- [31] T. VIDAL AND M. SCHIFFER, *Born-again tree ensembles*, in Proceedings of the 37th International Conference on Machine Learning, ICML 2020, 13-18 July 2020, Virtual Event, vol. 119 of Proceedings of Machine Learning Research, PMLR, 2020, pp. 9743–9753.
- [32] D. P. WILLIAMSON AND D. B. SHMOYS, *The Design of Approximation Algorithms*, Cambridge University Press, 2011.
